# Supplementary material for: Understanding racial differences of COPD patients with an ecological model: two large cohort studies in the US and Korea
Source: PubMed Central journal article supplement — Ther Adv Chronic Dis. 2021 Jan 22;12:2040622320982455. doi: 10.1177/2040622320982455 (PMC7841674; doi:10.1177/2040622320982455), 2021-01-22
Supplement: sj-pdf-1-taj-10.1177_2040622320982455.pdf [file sj-pdf-1-taj-10.1177_2040622320982455.pdf]

1 **Supplemental Table 1.** Adjusted prevalence ratios and 95% confidence intervals of clinical characteristics in mild-to-moderate and severe-to-  
 2 very severe COPD patients

|                                                   | COPDGene         |                   | KOCOSS                 |
|---------------------------------------------------|------------------|-------------------|------------------------|
|                                                   | NHW              | AA<br>OR (95% CI) | Koreans<br>OR (95% CI) |
| <b>Mild-to-moderate</b>                           |                  |                   |                        |
| Age ≥65 years                                     | <i>Reference</i> | 0.58 (0.49, 0.68) | 1.54 (1.43, 1.65)      |
| Sex, male                                         | <i>Reference</i> | 0.93 (0.85, 1.02) | 1.81 (1.73, 1.89)      |
| Smoking status, current                           | <i>Reference</i> | 1.60 (1.46, 1.73) | 0.85 (0.75, 0.95)      |
| Overweight or obese                               | <i>Reference</i> | 0.97 (0.91, 1.03) | 0.64 (0.59, 0.69)      |
| Education, high school or less                    | <i>Reference</i> | 1.67 (1.51, 1.84) | 2.67 (2.48, 2.87)      |
| <b>Symptoms</b>                                   |                  |                   |                        |
| Cough > 3months                                   | <i>Reference</i> | 0.67 (0.58, 0.76) | 0.5 (0.43, 0.58)       |
| Phlegm > 3months                                  | <i>Reference</i> | 0.80 (0.69, 0.91) | 0.80 (0.70, 0.90)      |
| mMRC ≥2                                           | <i>Reference</i> | 1.46 (1.32, 1.59) | 0.77 (0.67, 0.86)      |
| <b>Moderate-to-severe AE in the previous year</b> | <i>Reference</i> | 1.06 (0.90, 1.22) | 0.70 (0.58, 0.82)      |
| <b>Six-minute walk distance &lt;350m</b>          | <i>Reference</i> | 2.63 (2.29, 2.97) | 1.39 (1.17, 1.60)      |
| <b>Cardiovascular disease</b>                     |                  |                   |                        |
| Hypertension                                      | <i>Reference</i> | 1.31 (1.20, 1.43) | 0.78 (0.69, 0.86)      |
| Congestive heart failure                          | <i>Reference</i> | 1.46 (0.71, 2.21) | 0.80 (0.44, 1.17)      |
| Dyslipidemia                                      | <i>Reference</i> | 0.69 (0.59, 0.78) | 0.25 (0.21, 0.29)      |
| Myocardial infarction                             | <i>Reference</i> | 0.95 (0.60, 1.30) | 0.44 (0.29, 0.59)      |
| Peripheral vascular disease                       | <i>Reference</i> | 0.61 (0.19, 1.03) | 0.26 (0.11, 0.40)      |
| <b>Diabetes mellitus</b>                          | <i>Reference</i> | 1.61 (1.21, 2.01) | 1.48 (1.17, 1.79)      |
| <b>Gastro-esophageal reflux</b>                   | <i>Reference</i> | 0.66 (0.54, 0.78) | 0.34 (0.27, 0.40)      |
| <b>Osteoporosis</b>                               | <i>Reference</i> | 0.47 (0.29, 0.65) | 0.45 (0.28, 0.63)      |
| <b>Poor quality of life*</b>                      | <i>Reference</i> | 1.19 (1.09, 1.29) | 1.27 (1.16, 1.37)      |

**Severe-to-very severe**

|                                                   |                  |                   |                   |
|---------------------------------------------------|------------------|-------------------|-------------------|
| <b>Age ≥65 years</b>                              | <i>Reference</i> | 0.65 (0.54, 0.75) | 1.23 (1.11, 1.35) |
| <b>Sex, male</b>                                  | <i>Reference</i> | 1.04 (0.93, 1.14) | 1.72 (1.64, 1.81) |
| <b>Smoking status, current</b>                    | <i>Reference</i> | 1.30 (1.07, 1.53) | 0.89 (0.71, 1.08) |
| <b>Overweight or obese</b>                        | <i>Reference</i> | 0.92 (0.82, 1.01) | 0.35 (0.29, 0.42) |
| <b>Education, high school or less</b>             | <i>Reference</i> | 1.60 (1.42, 1.78) | 2.40 (2.21, 2.59) |
| <b>Symptoms</b>                                   |                  |                   |                   |
| Cough > 3months                                   | <i>Reference</i> | 0.68 (0.56, 0.80) | 0.59 (0.48, 0.70) |
| Phlegm > 3months                                  | <i>Reference</i> | 0.76 (0.64, 0.88) | 0.66 (0.55, 0.77) |
| mMRC ≥2                                           | <i>Reference</i> | 1.00 (0.95, 1.06) | 0.75 (0.69, 0.81) |
| <b>Moderate-to-severe AE in the previous year</b> | <i>Reference</i> | 1.03 (0.92, 1.15) | 0.77 (0.67, 0.88) |
| <b>Six-minute walk distance &lt;350m</b>          | <i>Reference</i> | 1.38 (1.28, 1.49) | 0.79 (0.68, 0.90) |
| <b>Cardiovascular disease</b>                     |                  |                   |                   |
| Hypertension                                      | <i>Reference</i> | 1.38 (1.24, 1.53) | 0.84 (0.71, 0.97) |
| Congestive heart failure                          | <i>Reference</i> | 1.26 (0.73, 1.79) | 0.64 (0.29, 0.99) |
| Dyslipidemia                                      | <i>Reference</i> | 1.01 (0.86, 1.16) | 0.20 (0.13, 0.26) |
| Myocardial infarction                             | <i>Reference</i> | 0.76 (0.42, 1.11) | 0.48 (0.26, 0.70) |
| Peripheral vascular disease                       | <i>Reference</i> | 0.85 (0.27, 1.43) | 0.54 (0.14, 0.95) |
| <b>Diabetes mellitus</b>                          | <i>Reference</i> | 1.69 (1.21, 2.17) | 1.87 (1.34, 2.40) |
| <b>Gastro-esophageal reflux</b>                   | <i>Reference</i> | 0.62 (0.47, 0.76) | 0.33 (0.22, 0.45) |
| <b>Osteoporosis</b>                               | <i>Reference</i> | 0.48 (0.29, 0.67) | 0.33 (0.16, 0.50) |
| <b>Poor quality of life*</b>                      | <i>Reference</i> | 1.02 (0.98, 1.06) | 0.89 (0.84, 0.94) |

3 COPDGene, US Genetic Epidemiology of COPD; KOCOSS, Korean COPD Subtype Study; NHW, non-Hispanic White; AA, African American;  
4 COPD, chronic obstructive pulmonary disease; mMRC, modified Medical Round Council; AE, acute exacerbation; \* defined as the St. George's  
5 Respiratory Questionnaire (SGRQ) or COPD-specific version of SGRQ total score ≥25. Adjusted for age, sex, BMI categories (underweight,  
6 normal, overweight, obese, and unknown), and smoking (former, and current)
